# Supplementary material for: Increased public health threat of avian-origin H3N2 influenza virus caused by its evolution in dogs
Source: eLife journal article supplement (doi:10.7554/elife.83470), 2023-04-06
Supplement: supp [file elife_poa_e83470_Figure_1_figure_supplement_5.pdf › elife_poa_e83470_Figure_1_figure_supplement_5.pdf]

---
