# Supplementary figures and images for: Increased public health threat of avian-origin H3N2 influenza virus caused by its evolution in dogs
Source: eLife journal article supplement (doi:10.7554/elife.83470), 2023-04-06

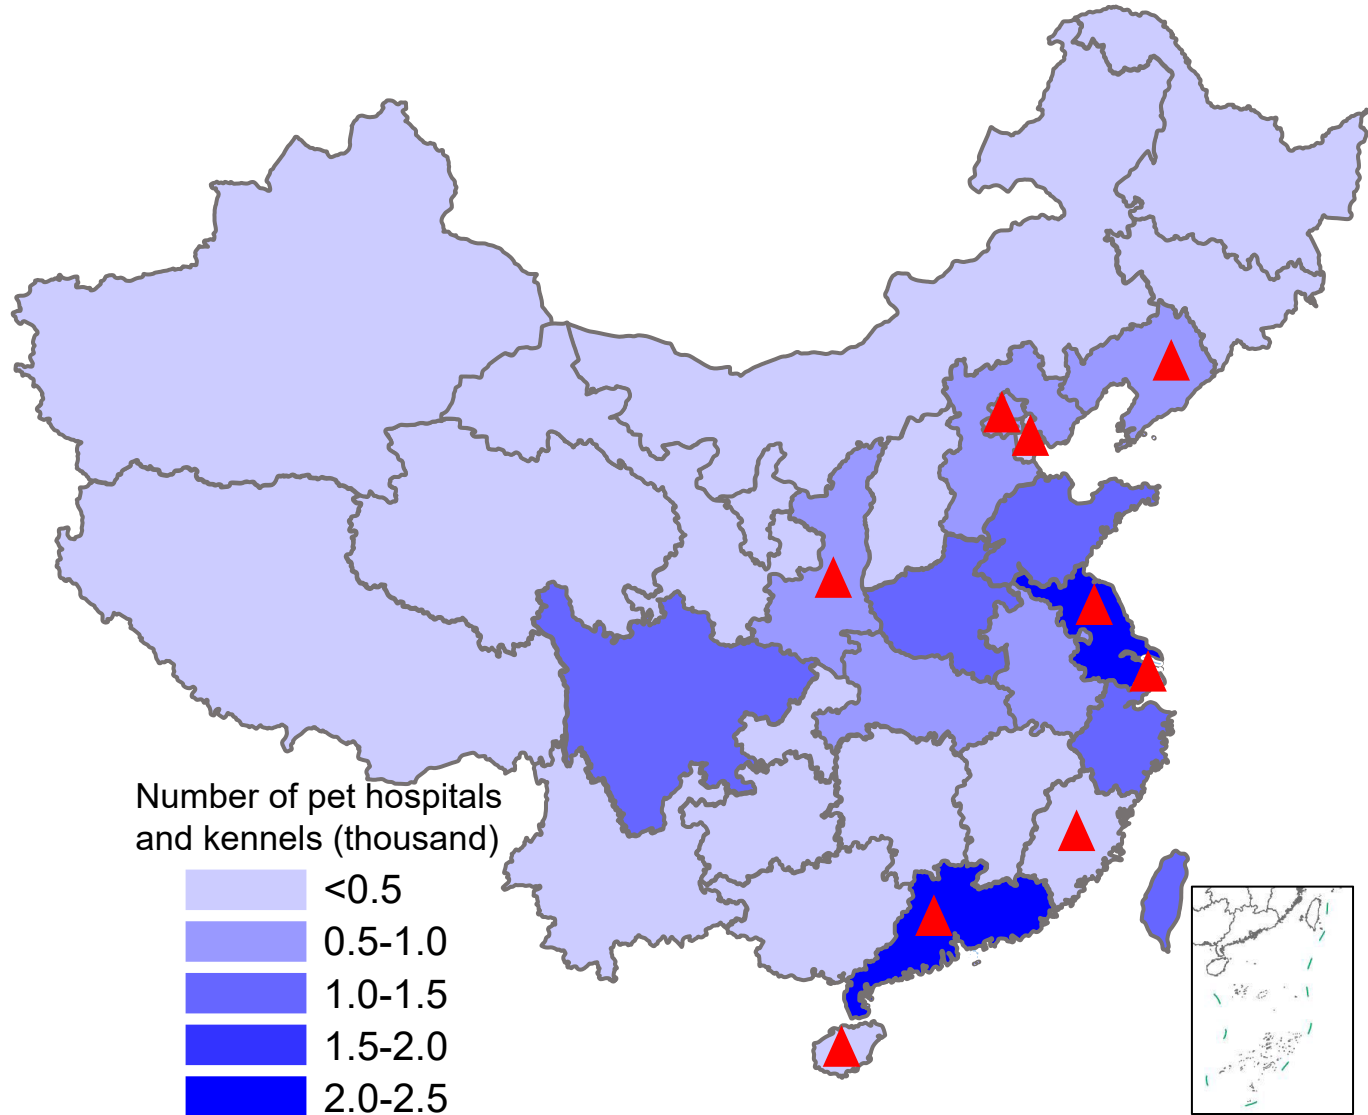

Supplement: supp [file elife_poa_e83470_Figure_1_figure_supplement_1.pdf › elife_poa_e83470_Figure_1_figure_supplement_1.pdf]

NS

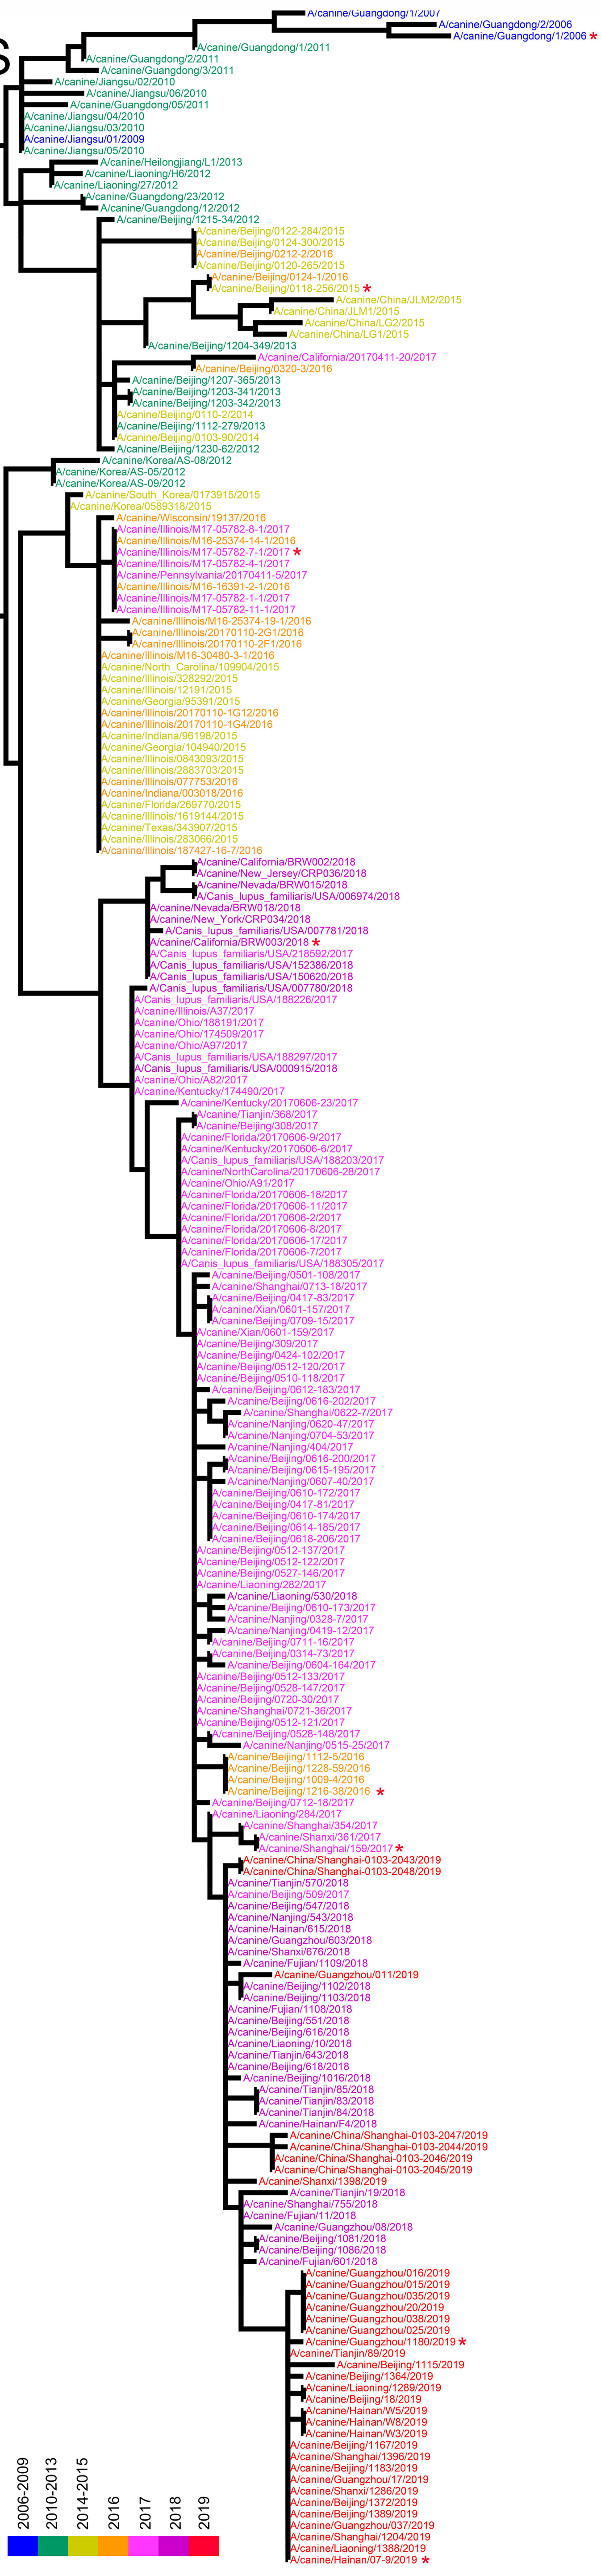

Supplement: supp [file elife_poa_e83470_Figure_1_figure_supplement_10.pdf › elife_poa_e83470_Figure_1_figure_supplement_10.pdf]

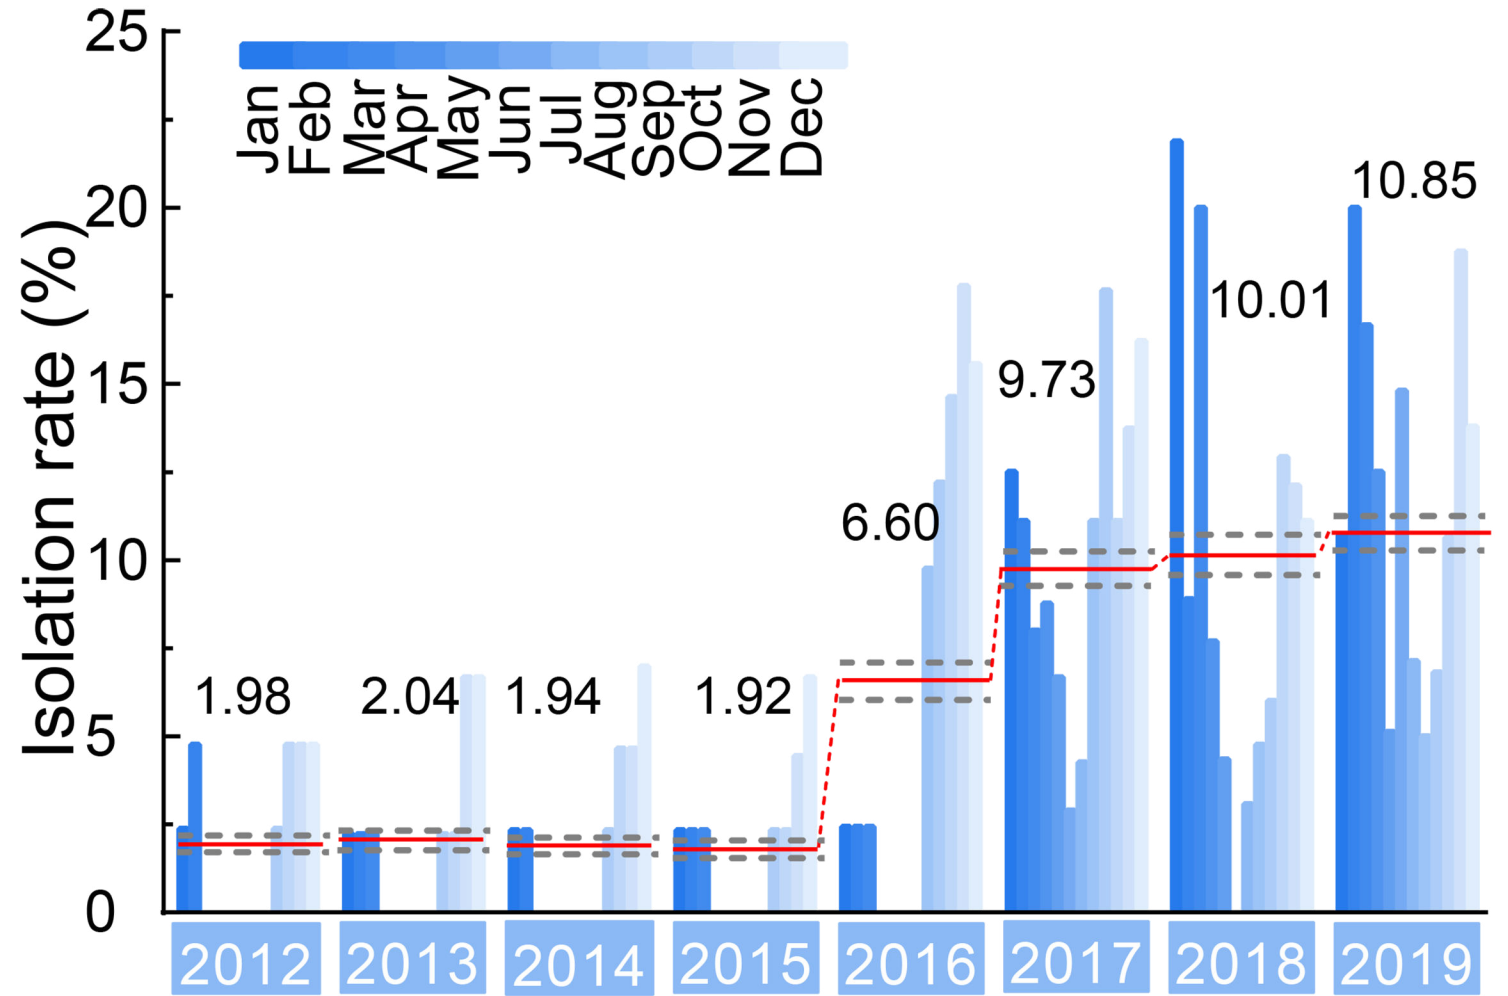

Supplement: supp [file elife_poa_e83470_Figure_1_figure_supplement_2.pdf › elife_poa_e83470_Figure_1_figure_supplement_2.pdf]

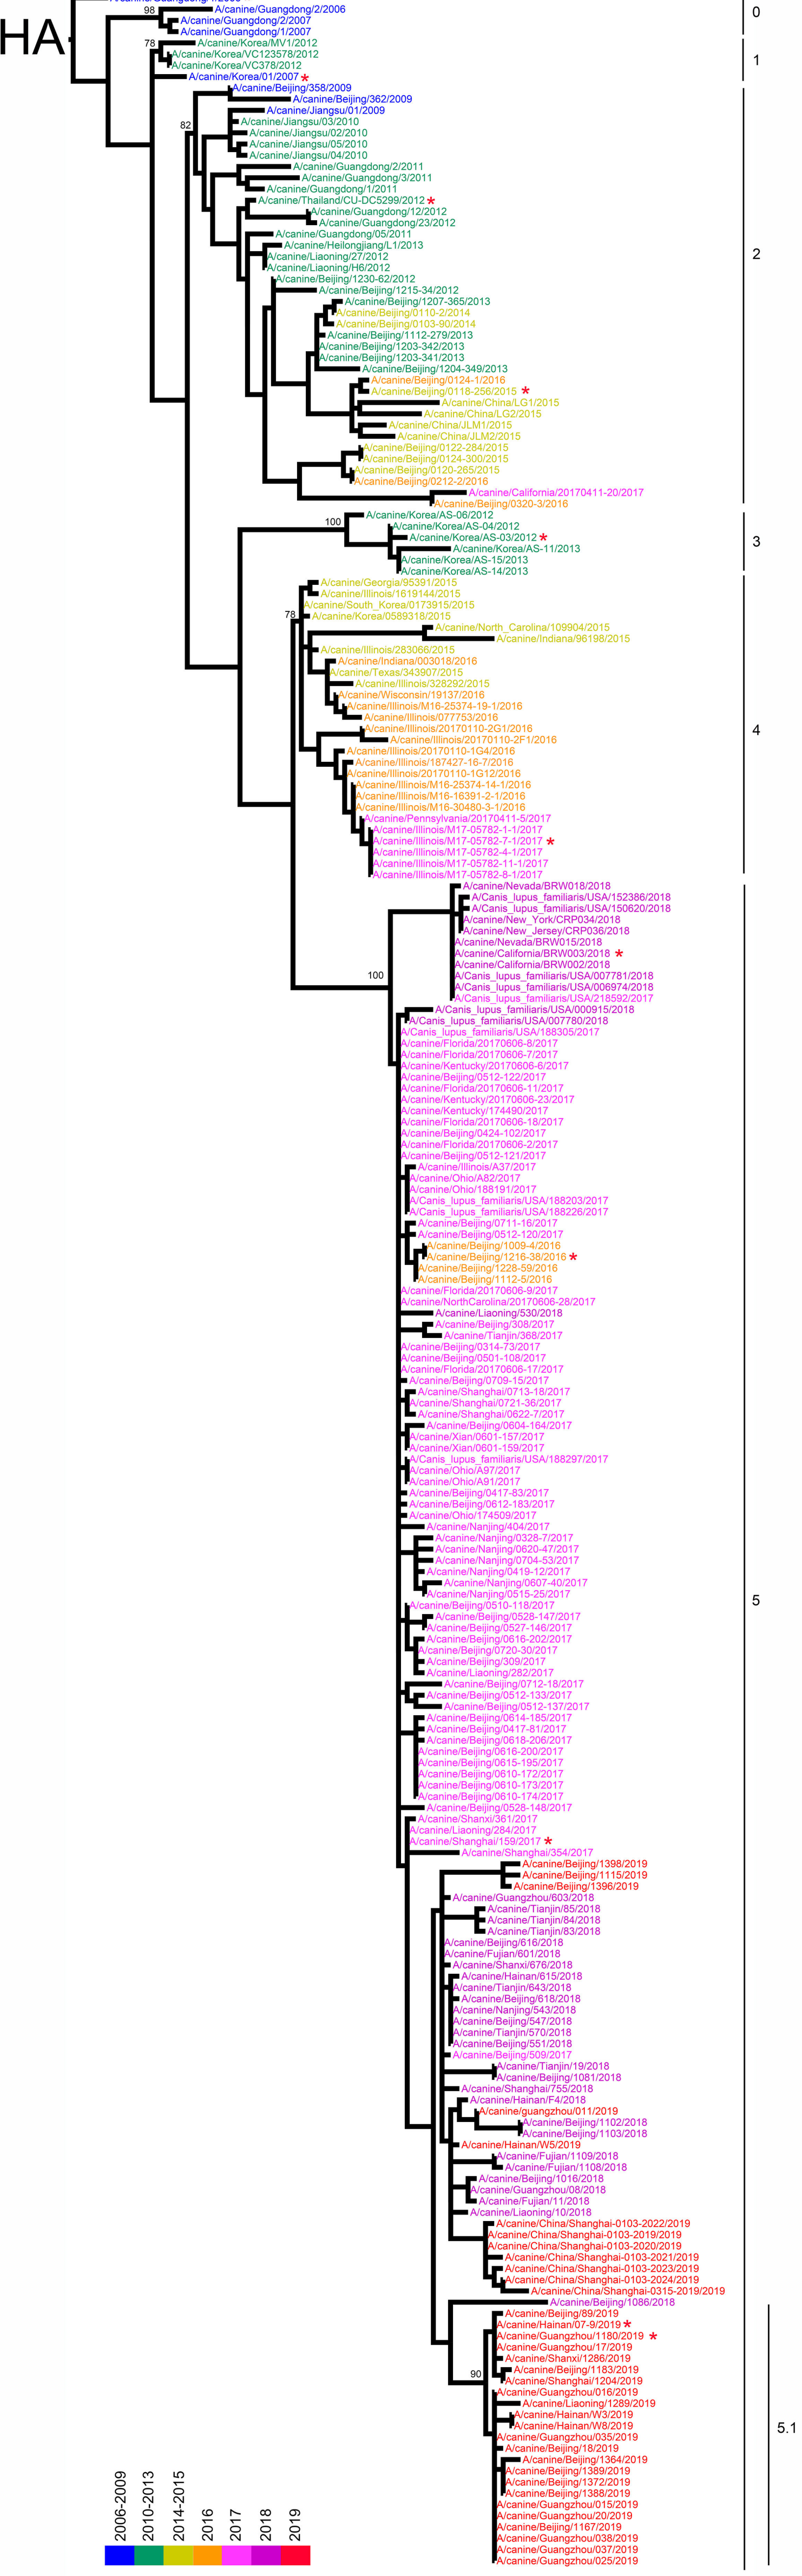

Supplement: supp [file elife_poa_e83470_Figure_1_figure_supplement_3.pdf › elife_poa_e83470_Figure_1_figure_supplement_3.pdf]

NA

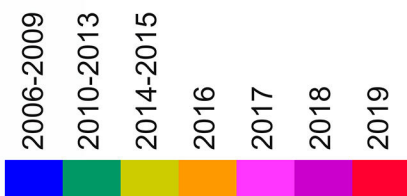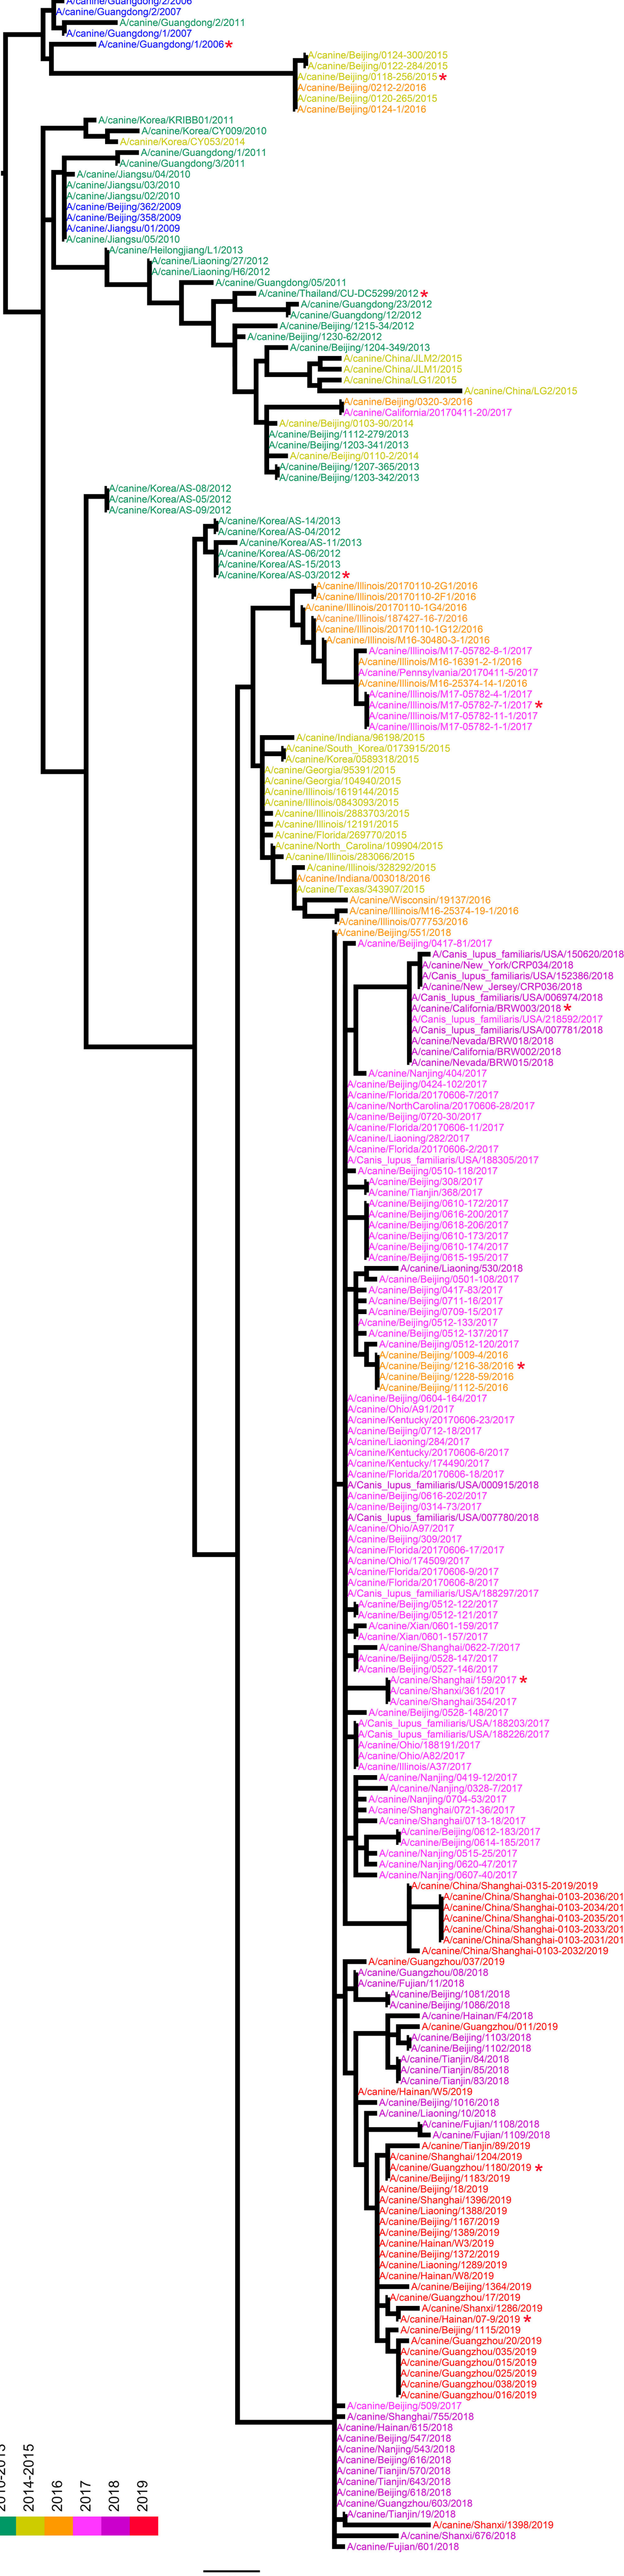

Supplement: supp [file elife_poa_e83470_Figure_1_figure_supplement_4.pdf › elife_poa_e83470_Figure_1_figure_supplement_4.pdf]

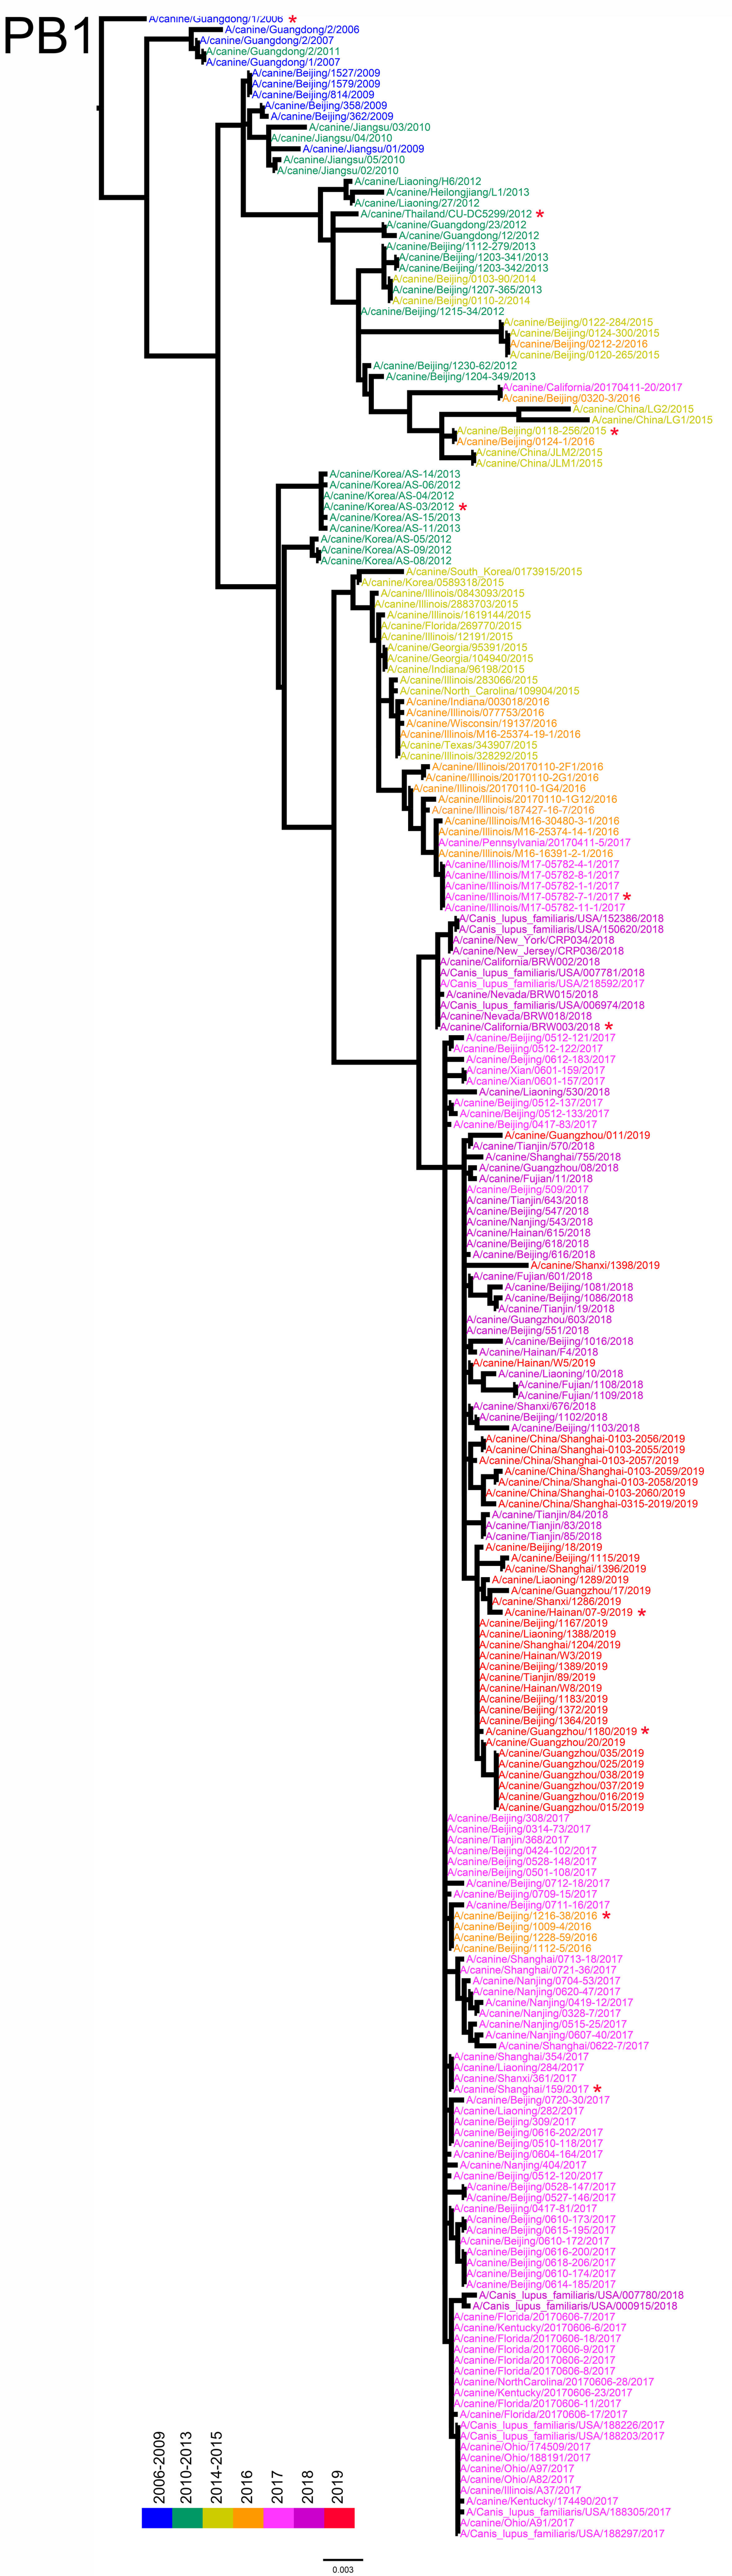

Supplement: supp [file elife_poa_e83470_Figure_1_figure_supplement_6.pdf › elife_poa_e83470_Figure_1_figure_supplement_6.pdf]

PA

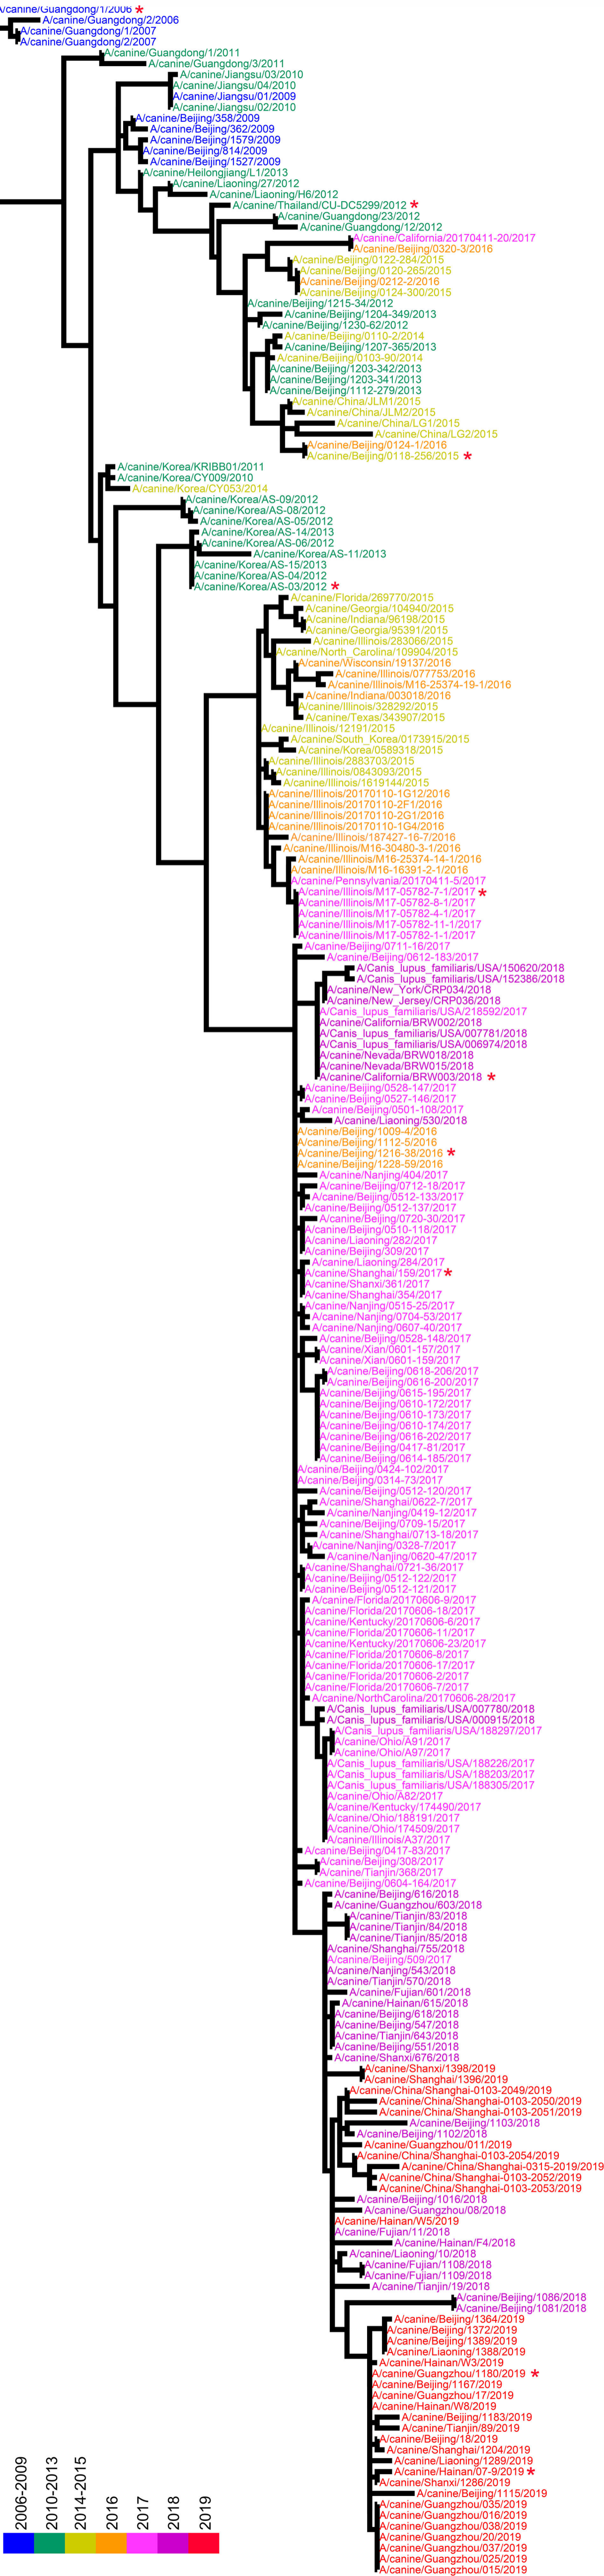

Supplement: supp [file elife_poa_e83470_Figure_1_figure_supplement_7.pdf › elife_poa_e83470_Figure_1_figure_supplement_7.pdf]

NP

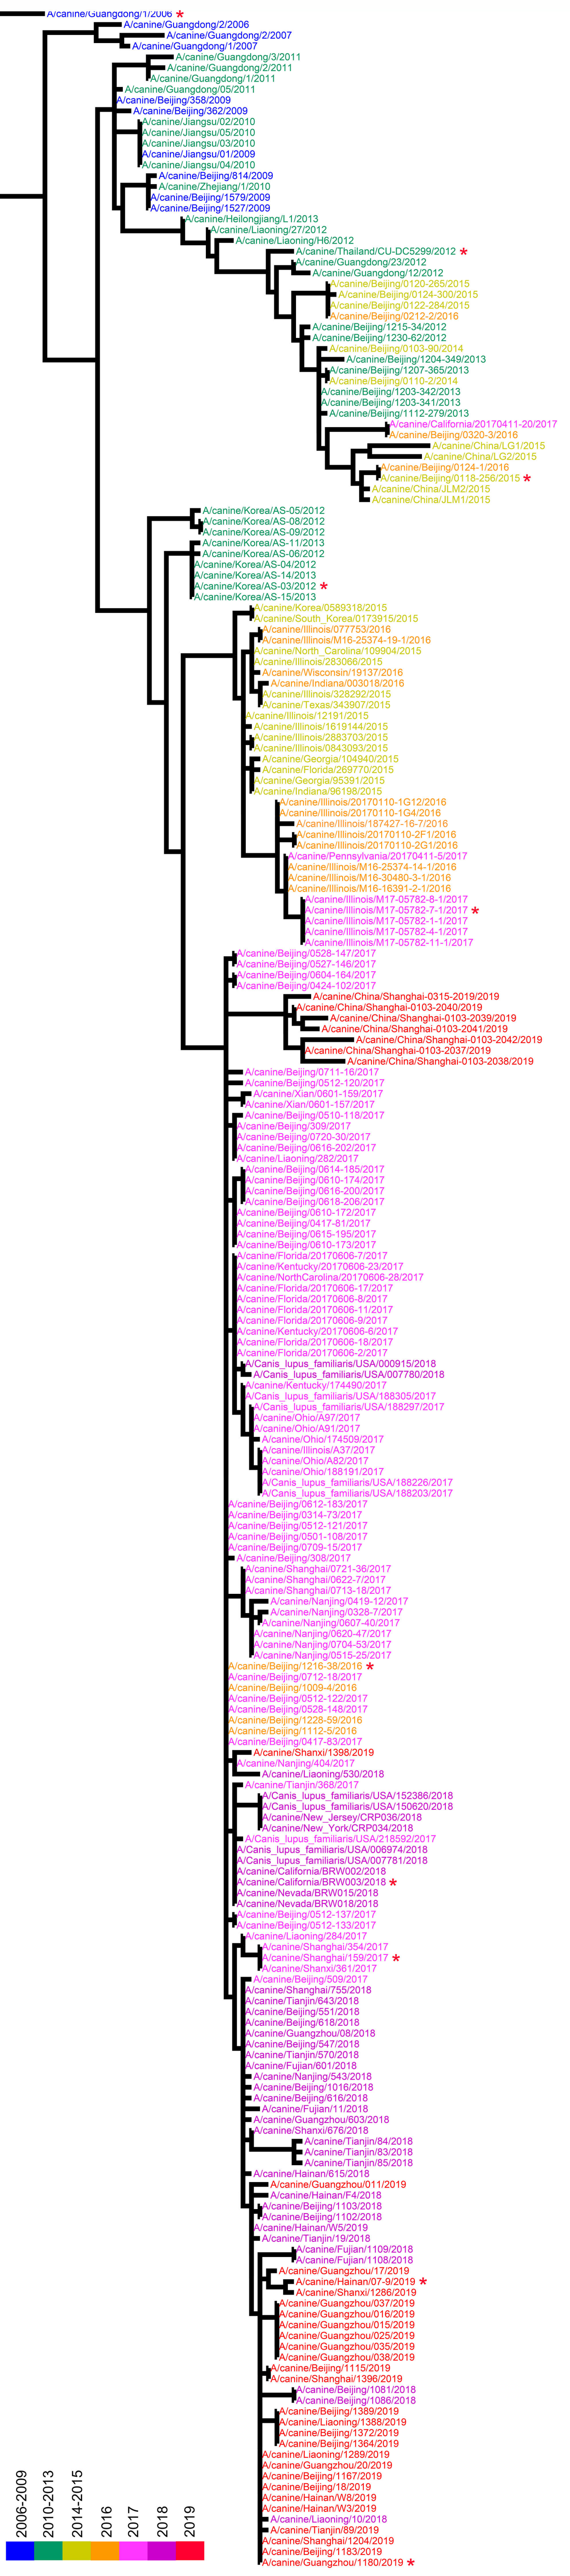

0.004

Supplement: supp [file elife_poa_e83470_Figure_1_figure_supplement_8.pdf › elife_poa_e83470_Figure_1_figure_supplement_8.pdf]

M

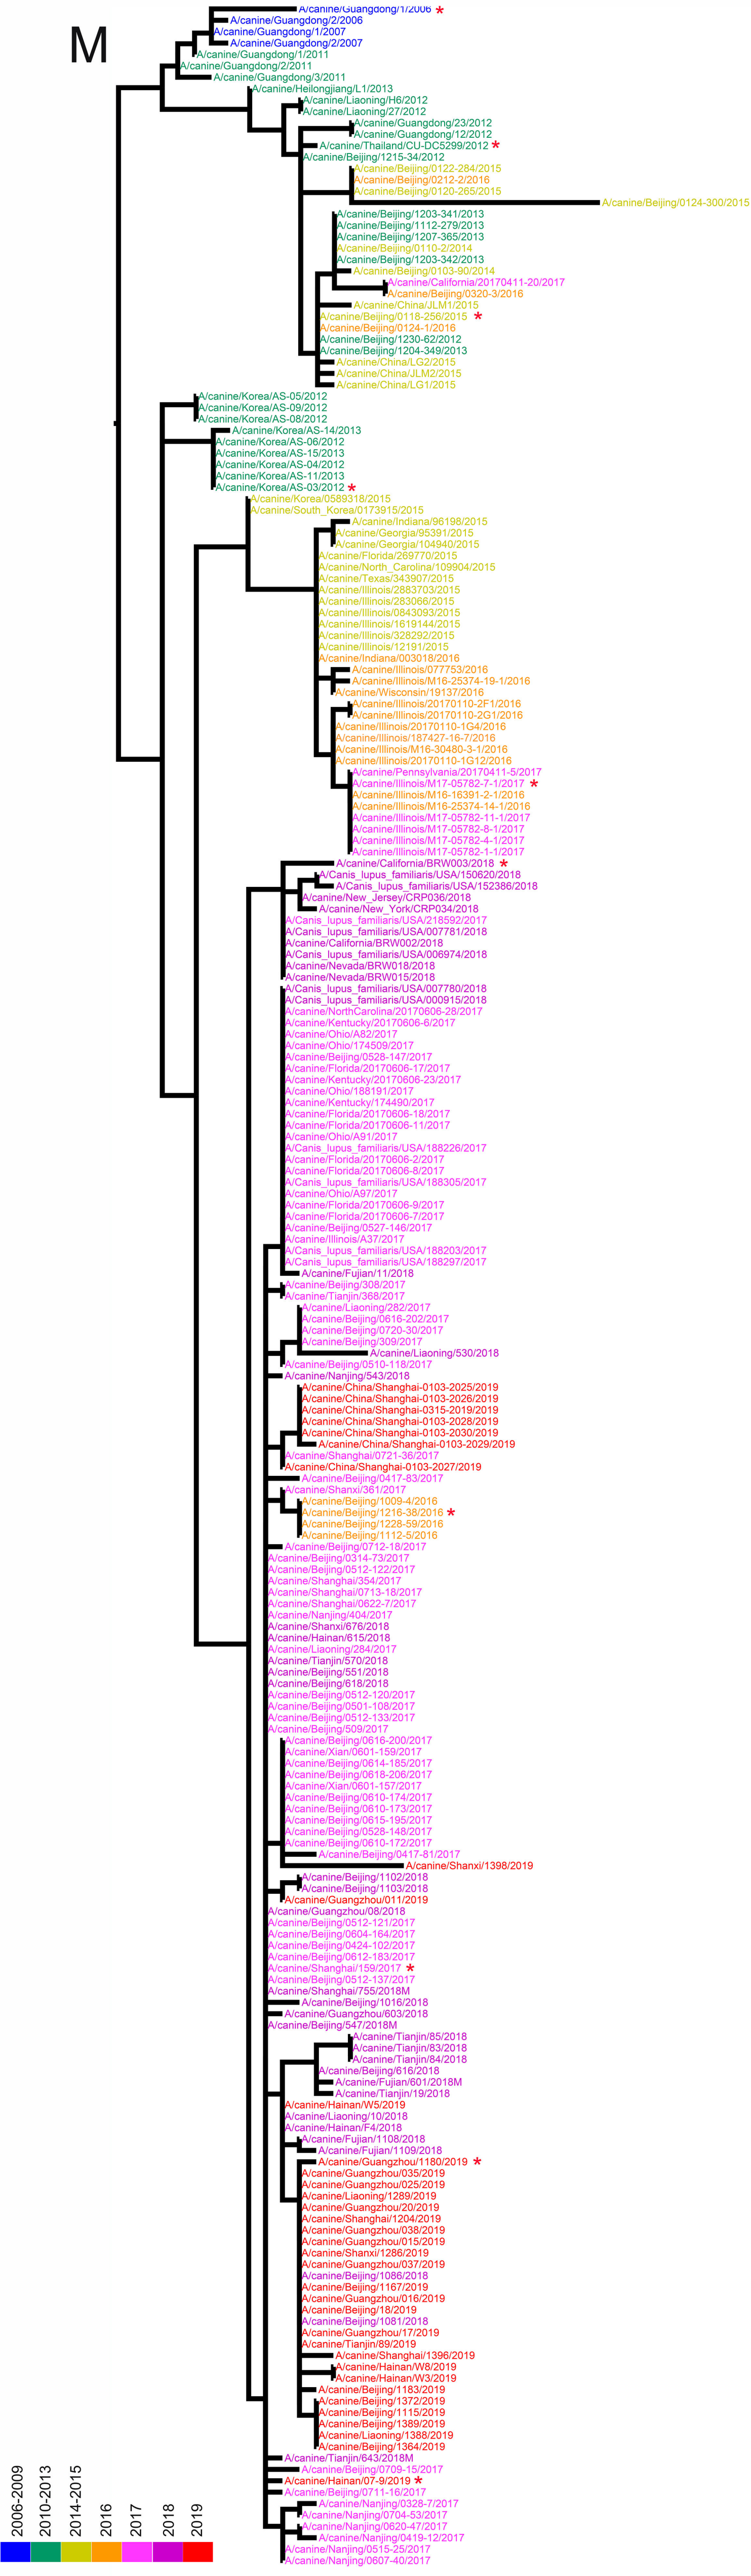

Supplement: supp [file elife_poa_e83470_Figure_1_figure_supplement_9.pdf › elife_poa_e83470_Figure_1_figure_supplement_9.pdf]

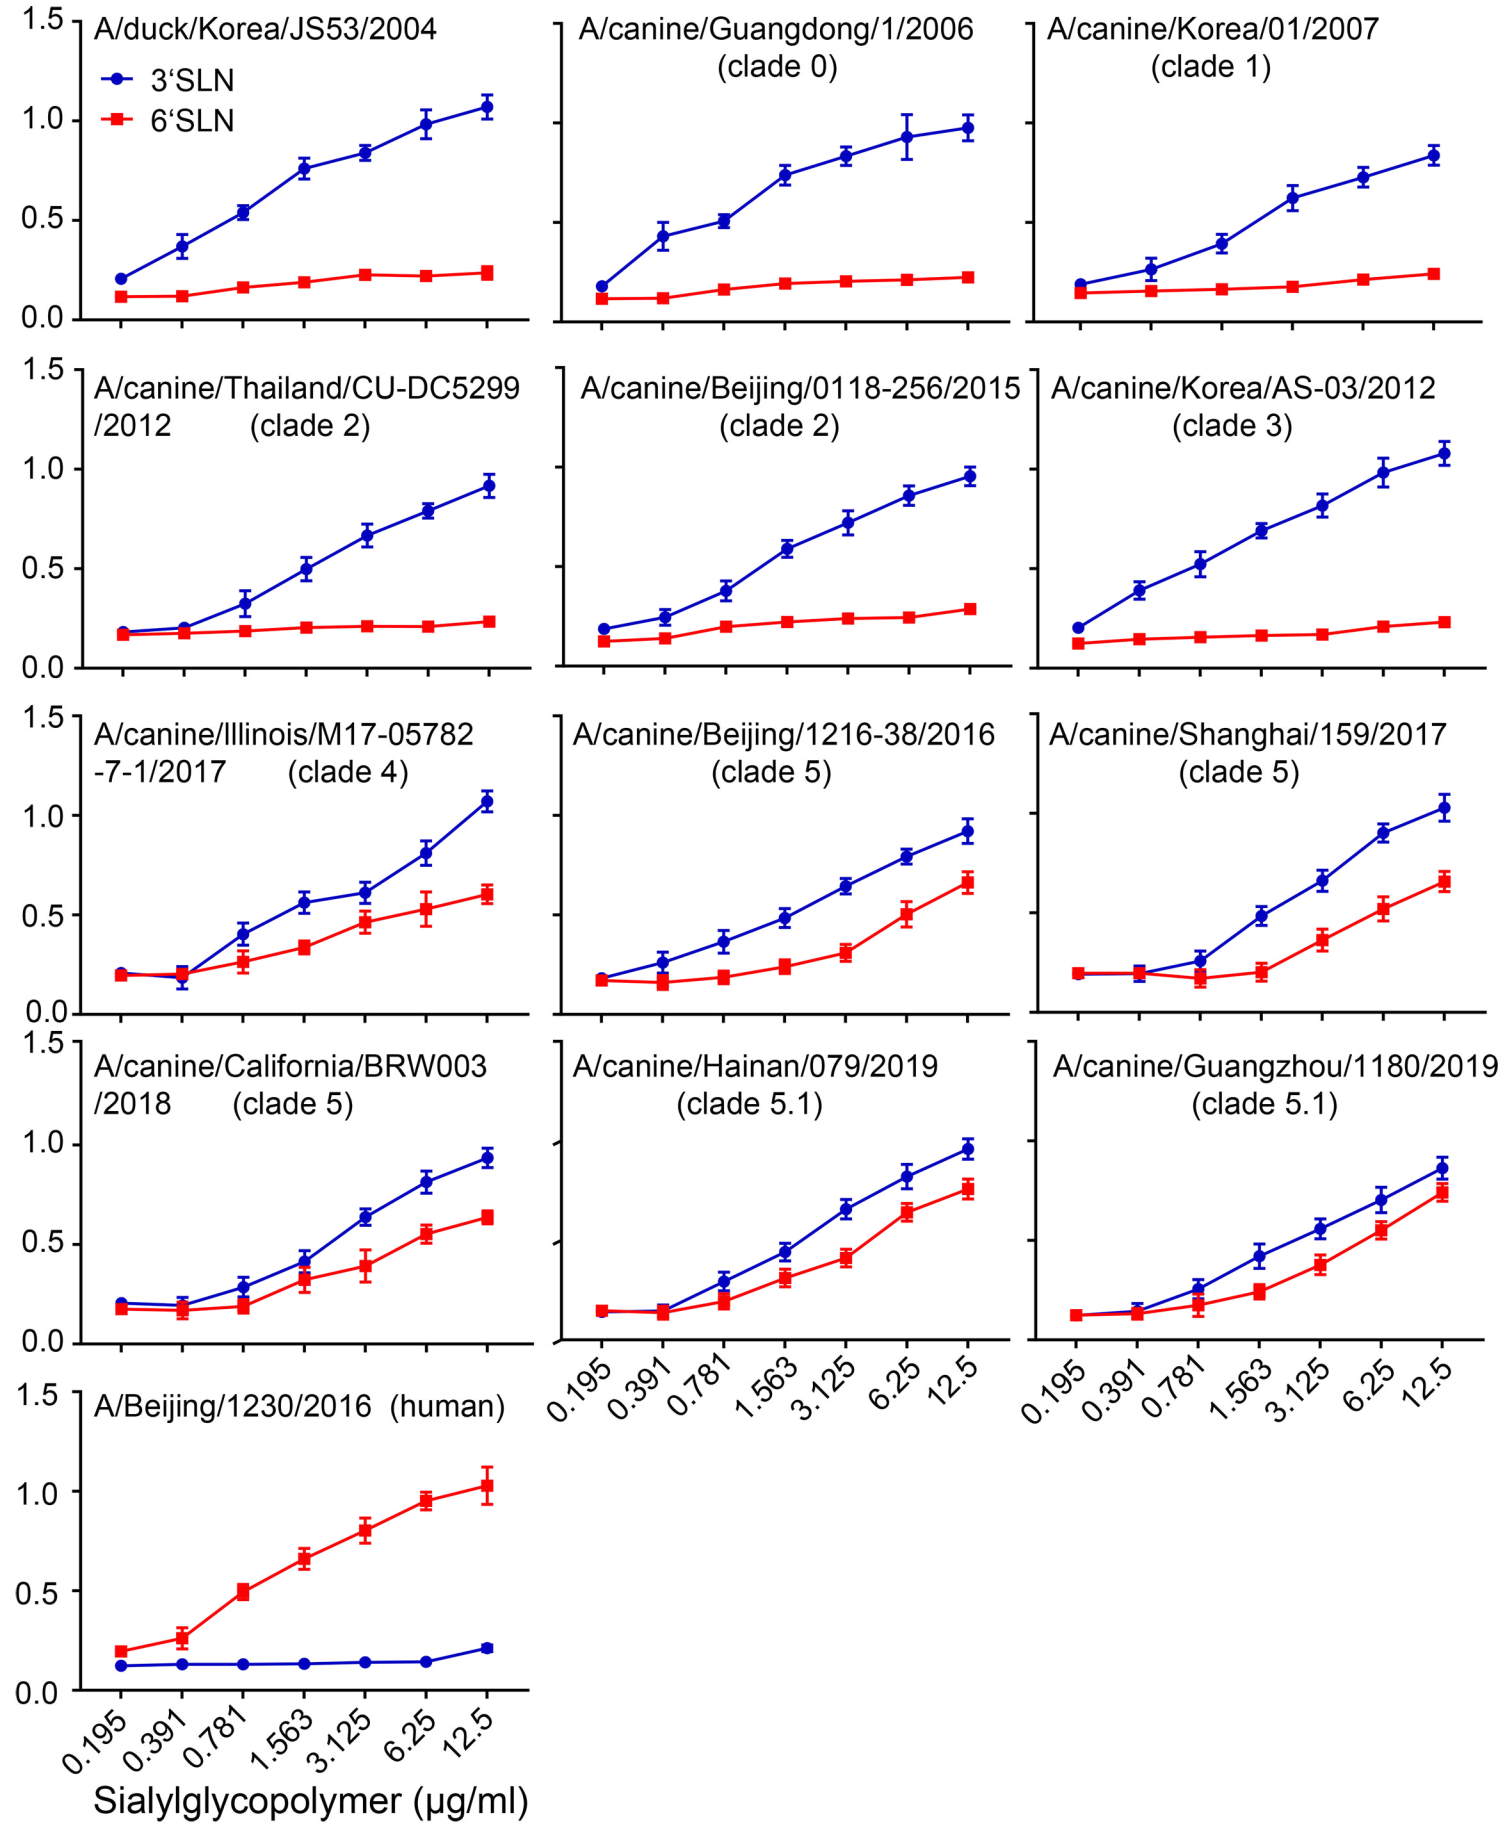

Supplement: supp [file elife_poa_e83470_Figure_2_figure_supplement_1.pdf › elife_poa_e83470_Figure_2_figure_supplement_1.pdf]

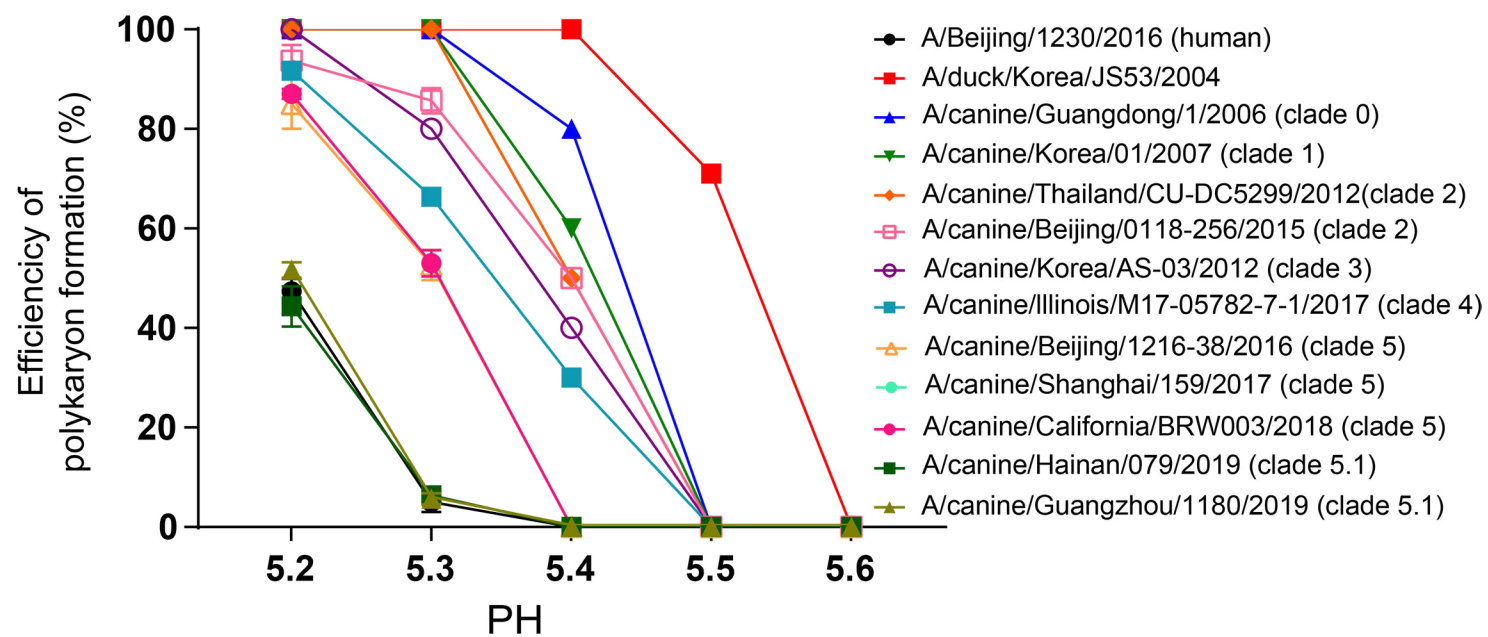

Supplement: supp [file elife_poa_e83470_Figure_2_figure_supplement_2.pdf › elife_poa_e83470_Figure_2_figure_supplement_2.pdf]

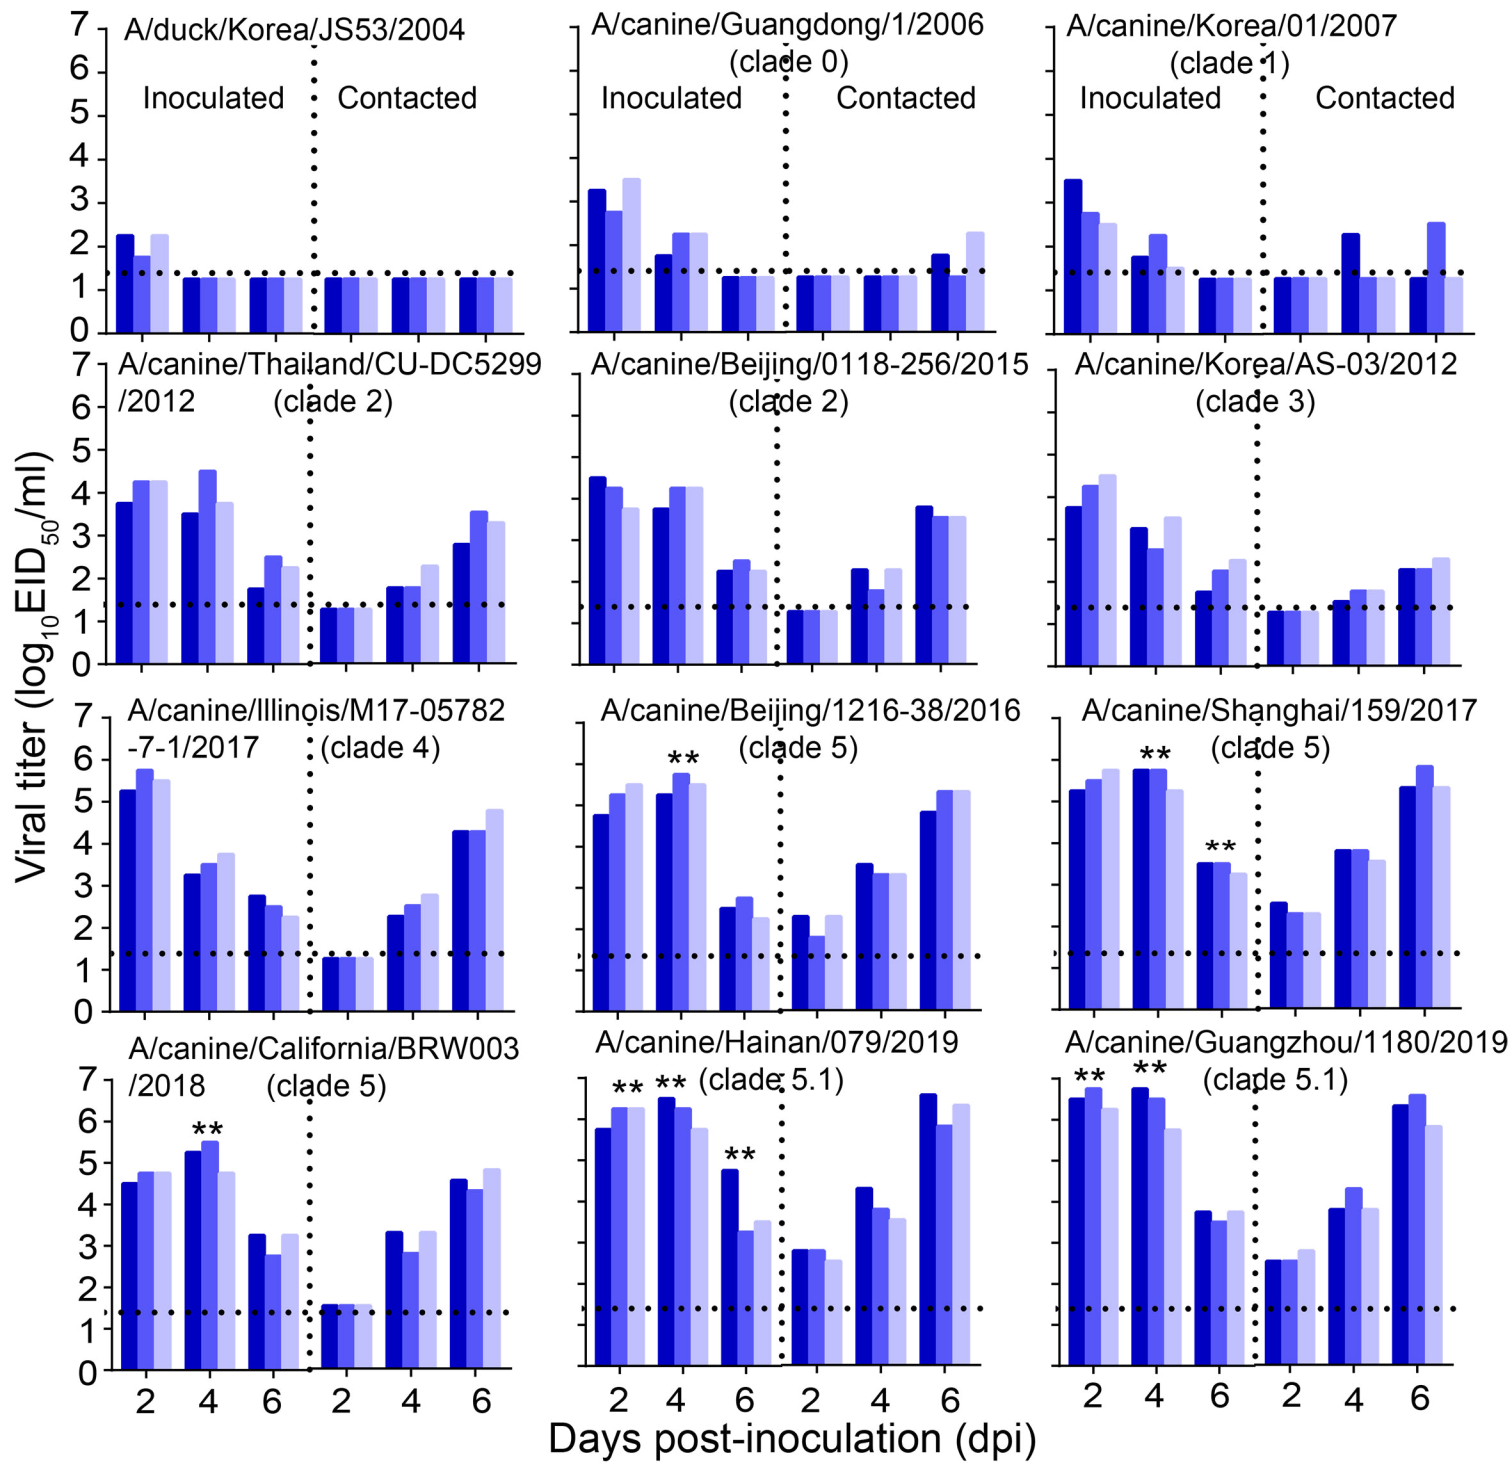

Supplement: supp [file elife_poa_e83470_Figure_4_figure_supplement_1.pdf › elife_poa_e83470_Figure_4_figure_supplement_1.pdf]

Percentage among H3N2  
canine influenza virus

HA

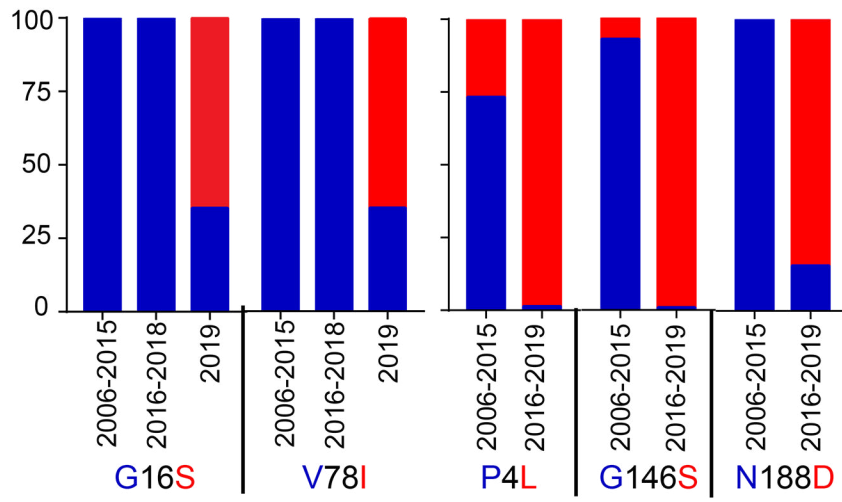

PB1

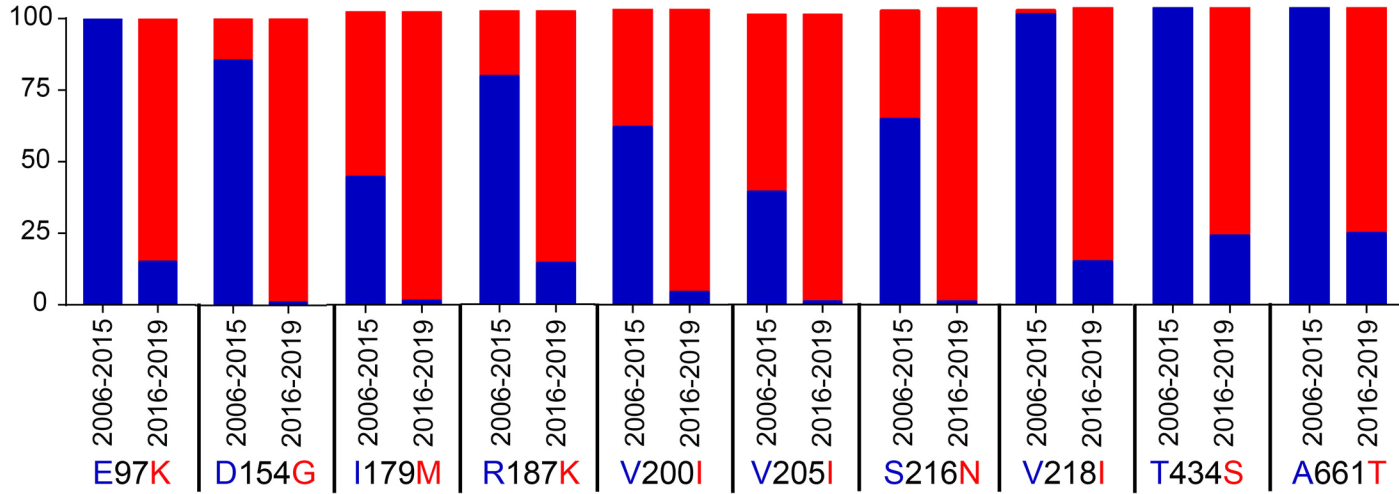

Supplement: supp [file elife_poa_e83470_Figure_6_figure_supplement_1.pdf › elife_poa_e83470_Figure_6_figure_supplement_1.pdf]
